# Supplementary material
Source: PubMed Central journal article supplement (PMC2804928)
Supplement: NIHMS99470-supplement-1.pdf [file NIHMS99470-supplement-1.pdf]

**Neuron, Volume 61**

**Supplemental Data**

**Synapses with inhibitory neurons differentiate anterior cingulate from dorsolateral prefrontal pathways associated with cognitive control**

**M. Medalla and H. Barbas**

**Table S1. Quantitative analysis of synaptic features (mean  $\pm$  SEM) in pathways from areas 32 and 46 to area 9.**

| Area 32 to 9                                                                 |                               |                               |                                     |                                     | Area 46 to 9                                                        |                               |                               |                                    |                                     |
|------------------------------------------------------------------------------|-------------------------------|-------------------------------|-------------------------------------|-------------------------------------|---------------------------------------------------------------------|-------------------------------|-------------------------------|------------------------------------|-------------------------------------|
| Post-synaptic target:                                                        | Spine                         | Shaft                         | Multiple sites                      |                                     | Post-synaptic target:                                               | Spine                         | Shaft                         | Multiple sites                     |                                     |
|                                                                              |                               |                               | >1 Spine                            | Spine + Shaft                       |                                                                     |                               |                               | >1 Spine                           | Spine + Shaft                       |
| <b>Analysis of labeled synapses</b>                                          |                               |                               |                                     |                                     |                                                                     |                               |                               |                                    |                                     |
| <b>Proportion of labeled boutons with distinct postsynaptic sites (%)</b>    |                               |                               |                                     |                                     |                                                                     |                               |                               |                                    |                                     |
| <i>n</i> = 345<br>total                                                      | <i>n</i> = 235<br>69 $\pm$ 2% | <i>n</i> = 67<br>18 $\pm$ 2%  | <i>n</i> = 43<br>6 $\pm$ 1%         | 7 $\pm$ 1%                          | <i>n</i> = 325<br>total                                             | <i>n</i> = 261<br>80 $\pm$ 2% | <i>n</i> = 39<br>13 $\pm$ 1%  | <i>n</i> = 25<br>5 $\pm$ 2%        | 3 $\pm$ 1%                          |
| <b>3D EM analysis of reconstructed labeled synapses</b>                      |                               |                               |                                     |                                     |                                                                     |                               |                               |                                    |                                     |
| <b>Bouton volume (<math>\mu\text{m}^3</math>)</b>                            |                               |                               |                                     |                                     | <b>Bouton volume (<math>\mu\text{m}^3</math>)</b>                   |                               |                               |                                    |                                     |
| <i>n</i> = 91<br>total                                                       | <i>n</i> = 62                 | <i>n</i> = 14                 | <i>n</i> = 15                       |                                     | <i>n</i> = 90<br>total                                              | <i>n</i> = 65                 | <i>n</i> = 13                 | <i>n</i> = 12                      |                                     |
| 0.23<br>$\pm$ 0.02                                                           | 0.18<br>$\pm$ 0.01            | 0.26<br>$\pm$ 0.03            | 0.44<br>$\pm$ 0.1                   | 0.39<br>$\pm$ 0.06                  | 0.15<br>$\pm$ 0.01                                                  | 0.15<br>$\pm$ 0.01            | 0.1<br>$\pm$ 0.01             | 0.2<br>$\pm$ 0.07                  | 0.2<br>$\pm$ 0.03                   |
| <b>Postsynaptic density (PSD) area (<math>\mu\text{m}^2</math>)</b>          |                               |                               |                                     |                                     | <b>Postsynaptic density (PSD) area (<math>\mu\text{m}^2</math>)</b> |                               |                               |                                    |                                     |
| 0.13<br>$\pm$ 0.01                                                           | 0.13<br>$\pm$ 0.02            | 0.14<br>$\pm$ 0.02            | 0.1<br>$\pm$ 0.01                   | 0.13<br>$\pm$ 0.03                  | 0.1<br>$\pm$ 0.01                                                   | 0.11<br>$\pm$ 0.01            | 0.06<br>$\pm$ 0.01            | 0.06<br>$\pm$ 0.01                 | 0.1<br>$\pm$ 0.04                   |
|                                                                              |                               |                               | total<br>PSD:<br>0.22<br>$\pm$ 0.04 | total<br>PSD:<br>0.29<br>$\pm$ 0.06 |                                                                     |                               |                               | total<br>PSD:<br>0.2<br>$\pm$ 0.06 | total<br>PSD:<br>0.12<br>$\pm$ 0.02 |
| <b>Spine volume (<math>\mu\text{m}^3</math>)</b>                             |                               |                               |                                     |                                     | <b>Spine volume (<math>\mu\text{m}^3</math>)</b>                    |                               |                               |                                    |                                     |
|                                                                              | 0.07<br>$\pm$ 0.01            |                               | 0.09<br>$\pm$ 0.03                  | 0.07<br>$\pm$ 0.02                  |                                                                     | 0.07<br>$\pm$ 0.01            |                               | 0.06<br>$\pm$ 0.01                 | 0.08<br>$\pm$ 0.03                  |
| <b>2D EM analysis of size of labeled synapses</b>                            |                               |                               |                                     |                                     |                                                                     |                               |                               |                                    |                                     |
| <b>Bouton major diameter (<math>\mu\text{m}</math>)</b>                      |                               |                               |                                     |                                     | <b>Bouton major diameter (<math>\mu\text{m}</math>)</b>             |                               |                               |                                    |                                     |
| <i>n</i> = 102<br>total                                                      | <i>n</i> = 61                 | <i>n</i> = 25                 | <i>n</i> = 16                       |                                     | <i>n</i> = 95<br>total                                              | <i>n</i> = 73                 | <i>n</i> = 13                 | <i>n</i> = 9                       |                                     |
| 0.93<br>$\pm$ 0.04                                                           | 0.9<br>$\pm$ 0.04             | 0.98<br>$\pm$ 0.07            | 0.91<br>$\pm$ 0.16                  | 0.9<br>$\pm$ 0.05                   | 0.8<br>$\pm$ 0.03                                                   | 0.8<br>$\pm$ 0.03             | 0.7<br>$\pm$ 0.06             | 0.8<br>$\pm$ 0.12                  | 0.8<br>$\pm$ 0.07                   |
| <b>Analysis of unlabeled asymmetric synapses in the surrounding neuropil</b> |                               |                               |                                     |                                     |                                                                     |                               |                               |                                    |                                     |
| <b>Proportion of unlabeled boutons with distinct postsynaptic sites (%)</b>  |                               |                               |                                     |                                     |                                                                     |                               |                               |                                    |                                     |
| <i>n</i> = 716<br>total                                                      | <i>n</i> = 519<br>73 $\pm$ 1% | <i>n</i> = 165<br>22 $\pm$ 1% | <i>n</i> = 29<br>4 $\pm$ 0.1%       | 2 $\pm$ 0.9%                        | <i>n</i> = 888<br>total                                             | <i>n</i> = 712<br>81 $\pm$ 2% | <i>n</i> = 147<br>15 $\pm$ 3% | <i>n</i> = 25<br>2 $\pm$ 0.4%      | 0.8<br>$\pm$ 0.3%                   |
| <b>Volume of unlabeled boutons (<math>\mu\text{m}^3</math>)</b>              |                               |                               |                                     |                                     | <b>Volume of unlabeled boutons (<math>\mu\text{m}^3</math>)</b>     |                               |                               |                                    |                                     |
| <i>n</i> = 99<br>total                                                       | <i>n</i> = 62                 | <i>n</i> = 21                 | <i>n</i> = 16                       |                                     | <i>n</i> = 73<br>total                                              | <i>n</i> = 58                 | <i>n</i> = 10                 | <i>n</i> = 5                       |                                     |
| 0.12<br>$\pm$ 0.01                                                           | 0.1<br>$\pm$ 0.01             | 0.11<br>$\pm$ 0.02            | 0.25<br>$\pm$ 0.1                   | 0.15<br>$\pm$ 0.05                  | 0.13<br>$\pm$ 0.02                                                  | 0.13<br>$\pm$ 0.01            | 0.13<br>$\pm$ 0.02            | 0.21<br>$\pm$ 0.03                 | 0.17                                |

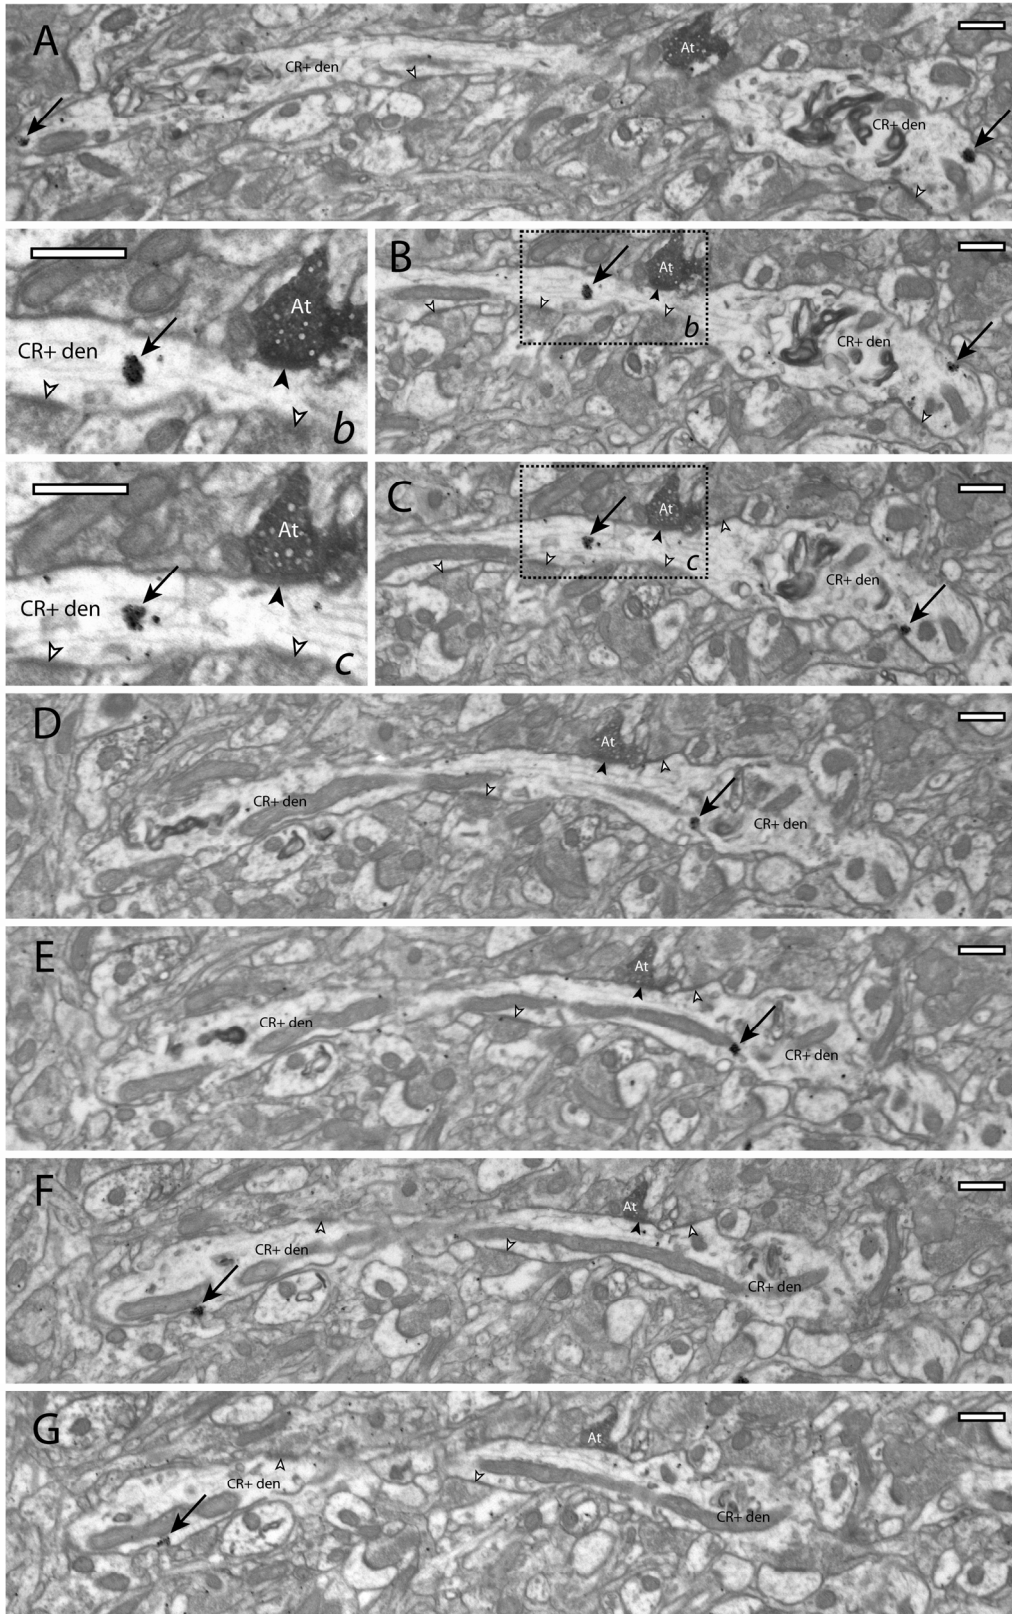

**Supplemental Figure 1.** EM photomicrographs of serial sections (**A-G**) of a bouton (At) from area 32 labeled with FE tracer forming a synapse (black arrowheads in B-F) with an aspiny dendritic shaft positive for calretinin (CR+ den), labeled with silver-enhanced gold (arrows). The CR+ dendrite is cut longitudinally and gold label appears in clumps, sparsely scattered within the dendrite and evident throughout the series of photomicrographs. Note the specificity of the clumps of gold label to the dendrite and the low level of background. The CR+ dendrite is also identified morphologically, based on the prevalence of shaft synapses (mainly asymmetric) from unlabeled boutons (silhouette arrowheads), and lack of spines. Insets in B and C show synapse of labeled bouton (At) at higher magnification. Scale bars = 0.5  $\mu\text{m}$ .
